# Supplementary material for: Selection and classification of gene expression in autism disorder: Use of a combination of statistical filters and a GBPSO-SVM algorithm
Source: PLoS One. 2017 Nov 2;12(11):e0187371. doi: 10.1371/journal.pone.0187371 (PMC5667738; doi:10.1371/journal.pone.0187371)
Supplement: S6 Dataset — This dataset was derived from the dataset selected by the COR filter. It contains 124 observations and 46 genes. (CSV) [file pone.0187371.s006.csv]

242306_at	244630_at	228878_s_at	1567237_at	244070_at	242366_at	221954_at	211171_s_at	219495_s_at	239657_x_at	244626_at	227196_at	225366_at	1567590_at	201489_at	1561928_s_at	243283_at	1555962_at	237851_at	1553640_at	242980_at	207004_at	228949_at	228757_at	207084_at	234972_at	230978_at	227618_at	211445_x_at	227738_s_at	1564876_s_at	241556_at	241817_at	1555687_a_at	1555888_at	209475_at	1561631_at	204055_s_at	222020_s_at	227476_at	213222_at	204648_at	216794_at	1565306_a_at	221840_at	215636_at	Class
10.6884	21.8899	31.4108	15.0292	13.2262	529.563	264.451	11.2321	74.6122	55.3385	7.3258	9.76233	136.376	14.4981	1338.55	34.9955	11.8318	46.1897	35.8889	15.2539	6.80985	69.6451	326.132	47.5533	13.6415	122.385	11.2888	629.309	1410.37	99.5831	30.9984	46.663	199.126	25.4022	457.741	578.161	5.47869	57.9672	10.0459	367.619	110.447	76.0285	18.302	11.2684	1664.87	12.0299	Control
17.6518	40.0741	45.7322	14.6736	16.4439	508.925	327.923	14.3552	55.2679	90.7618	10.3361	10.0034	172.941	12.2587	978.982	29.5095	10.5063	56.2728	78.1943	15.7989	8.9712	136.107	184.255	54.5874	16.1012	113.621	27.0912	366.288	798.436	173.517	35.7717	62.8129	169.873	23.4107	213.115	681.857	7.27907	17.0268	17.8102	263.902	87.6987	119.861	26.0344	17.0812	1354.37	12.6911	Control
11.9362	30.0464	32.929	10.8699	14.7921	370.926	283.551	10.8289	71.7377	53.1312	7.72376	10.2608	126.797	15.2262	1180.04	34.5665	16.9595	43.7753	44.5213	15.1073	11.5011	92.9328	291.843	52.785	17.4885	144.999	16.8104	410.011	962.254	140.358	34.5546	57.3363	165.863	15.4808	227.904	327.372	6.4506	24.2018	13.8244	290.802	58.0344	89.0935	24.6149	14.7212	1288.91	12.7565	Control
12.3205	23.0303	38.3921	11.7055	16.6536	359.608	237.032	11.8082	79.4614	87.0224	8.02749	10.4059	120.099	14.1333	926.399	26.9925	12.3603	38.8038	42.8595	18.9906	7.36541	80.9094	283.629	46.7924	13.0104	158.017	14.4928	396.04	1249.11	108.518	35.1397	50.9946	178.599	15.1993	411.153	504.772	5.81212	46.9295	12.9104	279.166	85.581	83.6447	21.7893	16.8156	1258.54	10.926	Control
14.0303	29.2362	48.5938	16.8163	17.8783	629.488	365.968	12.5018	75.2276	65.6662	8.53845	9.04039	174.622	10.7841	961.282	29.2805	11.9026	45.1731	59.2112	15.8499	8.75338	92.5636	359.281	49.9725	19.201	154.625	20.7077	431.853	1121.42	150.748	33.2655	49.4701	143.099	15.2341	326.111	530.827	5.67381	27.9595	14.956	398.67	134.184	95.0113	19.7247	13.5381	1436.2	12.5272	Control
11.3906	31.6399	29.3919	13.1252	11.4961	356.474	263.129	16.2236	67.6031	52.7843	8.7625	11.8281	93.6938	13.1096	862.955	31.7456	11.7544	61.9449	62.0255	17.4809	8.66485	92.3994	518.353	59.6099	16.3288	169.025	21.3988	259.75	908.467	129.133	33.0118	46.3467	134.333	16.1538	221.242	285.348	7.37014	13.719	16.3405	258.627	70.0745	93.9736	21.0323	16.5215	927.57	13.6189	Control
14.3224	32.0858	39.0725	15.8603	14.2073	457.087	281.343	13.0811	65.0223	70.4905	8.51779	9.32949	122.321	12.782	853.098	32.8866	12.1196	56.0905	67.8361	18.0242	8.61372	104.673	254.579	54.5507	16.4322	123.826	18.0842	489.868	1258.1	134.612	37.2117	47.2942	146.999	24.3427	350.397	543.624	7.69717	55.4436	15.7052	389.661	88.6366	90.1467	24.4957	17.9833	1420.89	12.1144	Control
13.1574	30.5163	40.0425	15.0899	16.2882	574.035	325.445	11.2434	86.7749	68.1252	9.31101	8.9846	237.314	11.929	885.621	34.3644	12.6595	50.0793	52.26	17.5117	7.725	119.021	437.15	47.7663	14.5307	138.61	22.129	430.045	1201.72	134.728	36.5486	52.6765	143.933	13.3386	675.616	795.975	6.70136	27.8258	12.8572	479.257	186.454	100.977	18.8953	17.6677	1288.51	11.5638	Control
10.2308	29.2282	45.3913	13.6401	19.0886	402.613	306.483	13.9604	74.8696	66.5234	9.45361	9.69732	157.521	12.5456	1088.22	28.4314	10.7349	49.4326	49.3735	19.086	10.1816	100.475	393.58	63.2349	17.9681	161.693	18.3938	466.699	1065.05	169.874	39.1113	54.2755	136.753	14.2767	308.654	476.781	5.55157	31.8197	14.9468	342.333	105.534	118.991	19.201	14.5967	1297.91	9.78234	Control
12.9951	29.0487	36.2321	14.6584	16.9447	362.382	278.043	11.0822	75.5047	44.1779	8.40759	8.53315	105.041	10.9956	972.426	31.0139	14.3351	51.5784	57.6582	17.4799	8.71741	87.7872	47.1519	52.2197	15.0814	119.59	18.2938	566.619	1184.6	134.394	30.7237	46.09	163.873	13.0895	460.195	534.191	6.04011	79.2553	13.6824	311.727	118.315	88.7594	18.0594	13.9948	1506.81	9.89391	Control
14.9506	28.6314	28.1806	14.4447	14.8557	366.129	204.201	14.0963	55.5407	66.449	9.95157	8.7238	96.6254	11.5939	1172.12	26.66	13.9628	46.9066	43.7535	16.0501	7.14144	89.928	362.024	69.4828	12.1092	130.38	16.7318	409.265	1235.33	132.308	30.8496	47.5834	149.711	19.3693	348.389	424.507	5.87575	79.3267	13.218	320.4	84.0705	75.6841	24.0776	16.666	1615.39	13.6728	Control
12.5508	29.1707	34.9574	13.0701	17.9237	511.599	317.962	12.5176	72.1153	56.3247	8.94268	10.043	168.191	13.0509	913.64	28.7146	11.3287	46.3405	44.0051	12.9676	8.75238	92.0459	346.067	50.578	15.1538	153.808	16.7705	536.95	1248.85	130.134	33.6092	50.9128	178.622	13.6605	501.399	667.978	6.2181	56.5253	13.9766	383.871	141.464	97.5138	20.6273	14.9023	1633.87	10.6959	Control
12.6315	38.6521	47.9616	14.1828	18.6172	475.658	287.485	16.3672	53.6383	92.3419	9.34557	11.3731	153.382	12.172	994.43	28.0789	11.1258	60.0941	62.4808	18.8055	7.53175	119.463	340.568	50.6844	17.7407	149.237	22.5004	360.877	1366.37	196.3	43.2321	48.605	124.562	14.1966	310.09	530.877	6.40569	16.2768	19.6215	345.916	100.556	112.117	19.7844	20.2939	1393.85	12.6345	Control
13.2347	20.9036	36.9907	13.5193	18.6286	536.584	351.704	11.3674	72.3751	63.1589	10.6302	10.7516	130.714	12.6743	973.943	26.5141	10.4602	36.4747	41.0749	14.2047	7.79163	65.7971	324.366	57.8574	13.7506	92.2882	13.755	462.583	1150.07	109.468	32.758	46.1758	160.042	14.1938	373.651	463.816	5.21151	20.6518	13.396	307.597	99.2915	91.0788	26.8667	10.4104	1489.54	10.7274	Control
13.325	40.3865	50.5501	14.9246	18.4775	553.122	342.441	12.8995	63.9557	63.759	7.41167	9.97463	161.867	12.365	1029.25	27.5891	10.5892	51.4123	60.3301	17.8638	8.64815	99.3729	472.168	55.2331	16.7586	120.96	23.2279	411.52	1181.23	161.617	41.0874	55.5802	135.444	21.8394	304.145	466.101	6.41135	24.7562	18.1994	397.312	114.745	107.491	20.8827	19.2007	1419.41	12.1541	Control
15.2788	19.4218	26.0187	12.8727	14.4025	515.62	277.006	11.742	79.88	52.1732	7.99699	10.5194	138.461	9.8299	918.904	32.6792	15.2366	50.1137	44.1355	16.2411	7.69187	75.7034	326.768	38.1265	11.1386	101.494	12.232	603.275	1325.4	103.348	27.2277	46.776	284.722	22.1713	466.529	700.28	7.10665	96.6739	12.9074	385.738	118.407	76.7924	16.3165	10.2919	1642.39	15.4759	Control
11.2851	14.9242	35.7025	12.9695	13.206	416.31	293.368	13.6654	71.2165	29.8418	7.44298	10.0983	167.532	11.2943	828.104	27.356	10.7493	64.2635	43.9891	14.3226	8.11916	82.4769	227.169	59.6705	13.7468	156.73	18.7883	408.13	1057.21	84.4569	28.0552	44.0114	126.429	16.7122	319.598	381.515	5.49948	18.7555	8.523	326.186	99.6788	93.7525	21.9255	11.7593	1429.96	11.7696	Control
16.5353	31.5952	51.9709	19.5096	12.3748	336.563	255.219	15.1868	53.4541	98.4534	7.53593	9.28665	90.9781	13.7226	711.08	36.3781	10.9237	53.29	67.7952	19.6807	10.2772	108.15	122.618	54.3997	14.8857	119.625	23.0901	251.907	1293.22	187.254	47.4846	57.7117	136.043	13.5271	363.095	454.437	7.19346	21.4883	20.8982	346.116	58.1176	114.912	25.5969	16.8021	933.394	13.1339	Control
17.0595	33.4365	37.7242	15.5563	17.4478	413.137	316.183	12.5228	69.8076	66.7388	9.61283	8.85557	159.101	13.0479	971.74	27.6229	12.0547	61.8476	73.0035	15.4172	8.58534	91.9574	231.142	59.8728	14.1313	143.946	20.2129	449.048	1262.64	139.721	33.9704	57.6337	153.658	20.4073	396.705	494.934	5.7392	28.8981	16.7533	341.853	74.6842	99.5967	18.0605	21.8603	1536.13	12.3001	Control
14.2079	42.1262	48.917	22.8399	16.3691	390.261	277.944	12.8148	50.243	85.8326	11.9636	9.97179	109.595	16.449	890.29	30.0268	11.2201	64.5474	81.1235	20.0207	9.77518	109.371	306.252	66.867	16.5471	137.027	27.6265	328.422	1291.97	166.057	48.2144	52.345	120.531	15.5378	258.864	389.556	6.31725	15.744	18.1016	249.372	42.9713	125.249	27.2587	19.0775	932.258	12.3395	Control
15.98	37.3057	44.5086	14.0178	17.7912	694.335	409.475	12.4243	71.8951	70.4137	8.04205	10.418	118.902	15.4986	1172.96	35.1586	18.8701	49.7631	52.8008	11.8192	7.19936	102.914	311.007	49.4213	24.1217	112.881	17.1947	726.336	1073.29	118.017	38.2361	54.6658	192.003	14.7469	340.529	354.378	8.38253	30.6235	17.1133	319.401	111.832	93.3372	25.6983	12.1904	1729.46	8.73623	Control
14.1258	35.5378	53.2223	13.4995	13.8242	349.752	257.09	13.8539	53.991	60.8322	8.85143	9.53006	116.274	14.9205	856.005	29.006	17.07	66.0951	62.078	13.3046	8.90372	99.6917	95.5046	53.0869	17.0805	143.547	20.1522	339.628	1378.11	148.145	43.111	52.5304	131.962	15.3375	264.382	452.571	6.58751	37.4443	13.6022	317.161	54.6591	114.695	25.8968	14.7116	1250.79	10.7774	Control
9.80059	27.0446	37.6035	9.04651	20.3746	578.29	303.776	14.3601	70.0539	60.4646	9.08294	7.19549	253.964	11.8307	843.526	24.3382	12.2079	41.2579	58.0939	22.0642	8.39642	59.5998	368.217	46.3866	15.5873	140.946	15.7503	457.077	931.019	101.384	30.1785	47.6423	162.322	11.5863	463.752	587.241	6.14435	42.9866	11.8142	469.964	124.381	79.9829	21.5192	18.9957	1606.94	13.6706	Control
13.0438	26.8879	28.6306	11.5693	12.9487	551.611	335.367	9.15142	90.9387	49.3898	7.57177	12.0893	171.024	8.5417	1212.73	25.9639	15.1608	46.1958	44.9639	14.874	8.41543	87.9255	431.472	46.1514	12.7925	138.196	14.4415	728.699	1142.26	116.466	27.4209	39.7815	287.32	9.74645	579.259	692.922	5.94262	72.259	13.8406	425.533	73.6121	67.0041	25.0716	12.6158	1882.93	12.6389	Control
12.6698	29.7642	41.4478	18.2281	13.7813	372.271	359.052	11.5041	107.776	56.6719	10.016	9.12378	120.102	13.8844	776.06	20.92	14.6525	48.0016	53.0298	22.4429	6.85822	79.8093	191.16	50.5789	16.5619	133.627	16.2476	382.238	1147.71	122.844	33.2123	51.4391	120.261	13.1797	256.78	501.917	6.71321	51.6542	15.6775	285.025	105.16	97.9601	26.7326	21.4825	1239.03	11.4043	Control
13.8357	31.5169	37.4713	11.7983	20.2312	610.668	395.303	9.92081	67.3259	62.4734	10.4146	8.64438	193.321	11.4126	1096.24	36.7013	11.8163	49.2459	50.4435	17.5854	8.39855	111.462	470.05	48.9337	17.4333	126.015	18.8658	635.87	1213.36	149.148	34.3703	52.8753	222.106	12.4066	563.092	739.471	6.31443	49.0596	14.029	483.118	88.5411	96.7161	19.783	12.697	1891.65	11.408	Control
11.091	32.6145	38.8245	13.1906	19.5369	592.248	370.913	11.2506	60.1577	62.9707	8.68265	11.507	180.622	12.4089	1049.68	22.1929	10.8674	53.5528	63.0135	16.7374	8.12424	92.9322	544.255	44.8293	15.9397	134.095	21.8783	448.79	1161.28	174	30.6328	51.8463	140.146	22.3673	288.369	514.173	6.55049	24.3361	15.6626	431.515	111.804	118.255	19.3277	12.7834	1461.26	12.4406	Control
11.9111	18.4473	25.5045	11.3463	17.1807	433.472	361.442	10.9272	75.1367	56.8727	9.04368	9.29222	186.672	10.5632	1028.2	31.4411	9.41499	45.2578	44.8759	15.5301	9.72475	78.0878	213.321	43.0517	14.8666	145.803	11.9878	355.736	947.801	92.4879	28.9281	51.8778	140.35	13.8754	324.679	403.001	5.68783	24.5609	10.3275	321.15	126.596	101.491	24.1681	9.19461	1435.39	9.98983	Control
14.0106	17.4134	35.1556	14.7892	16.6811	520.008	331.59	12.1086	76.6388	59.5282	8.44761	10.2702	187.585	12.9035	968.971	27.6732	13.7736	43.7043	43.637	20.3123	8.64735	79.5857	567.97	57.5251	12.1368	119.323	15.7214	478.496	964.694	79.1769	34.9554	51.0762	209.686	14.9023	437.447	471.547	6.33088	60.5065	14.2383	406.428	118.875	80.2885	22.6541	10.4151	1520.69	13.6061	Control
12.6962	26.9005	34.5534	13.9662	15.7644	519.093	363.828	12.5697	79.639	59.4838	8.35506	10.1669	129.837	16.9771	1300	31.2901	19.4424	38.5462	62.6021	16.1124	8.15139	84.1095	518.889	47.0329	17.5102	123.39	15.3255	491.371	1021.34	126.442	32.8021	58.7432	145.61	18.3128	386.606	447.041	7.22602	28.9203	14.643	395.055	116.163	90.5606	22.5553	13.0583	1359.36	10.0107	Control
14.088	26.3263	35.0446	11.9131	15.4916	518.289	364.87	10.1037	90.113	71.5692	8.02148	8.4441	165.175	12.3017	1070.46	32.0351	11.2951	43.8478	54.5343	16.1677	8.27335	83.6698	461.15	50.7086	14.2362	159.703	14.3973	557.737	1154.51	124.29	30.3388	54.022	199.628	22.3304	375.989	529.335	6.31359	35.541	14.6335	333.772	130.191	95.5895	21.722	16.9202	1373.51	12.5556	Control
11.9978	30.8859	42.5205	15.8313	18.6225	497.714	418.664	13.1077	59.4721	60.0695	9.76212	8.92702	151.213	10.9487	984.041	29.92	12.1597	40.5796	58.9801	17.9077	9.56916	94.3632	663.913	58.3699	18.6084	141.22	19.9072	493.438	1255.39	149.46	38.3137	58.511	160.755	16.2352	406.913	639.955	6.69699	29.4765	15.1915	383.934	102.178	116.264	24.3795	14.2654	1517.44	12.9952	Control
15.2473	20.4543	32.5339	12.4053	14.8465	682.625	312.659	12.1123	81.6449	56.7084	11.2016	11.0749	186.188	12.1461	1133.92	33.6949	15.4072	44.1168	49.5598	14.7428	8.10374	76.8564	385.25	51.4964	13.8343	99.2573	14.0004	619.577	1093.73	111.285	34.4347	47.7016	184.594	21.1287	460.388	656.944	5.47587	43.1108	14.5545	496.47	113.886	84.0719	21.6101	9.79172	1636.01	12.3474	Control
14.4105	22.1636	28.2821	15.3525	17.7108	502.448	327.295	11.6474	87.5751	67.4054	8.48588	10.0315	146.545	10.2362	1022.78	32.1329	12.1305	57.6338	51.5276	17.6704	7.35902	80.5265	208.64	55.5784	14.1922	89.5261	12.9061	509.227	1068.49	108.409	36.6733	53.3085	175.641	17.3335	455.152	506.572	6.09319	33.6644	14.4511	327.752	166.688	96.9632	22.4429	13.4653	1468.36	9.89216	Control
16.3593	39.11	35.2293	12.4624	17.0416	516.549	389.335	11.5272	52.296	75.5757	10.2282	9.79673	116.457	17.0401	1420.08	27.0963	10.9014	39.562	61.1443	15.8452	8.8599	101.756	221.678	55.6979	15.0113	160.643	16.3633	393.544	983.578	138.821	27.9886	47.9687	136.246	15.3335	186.552	317.939	6.46466	26.5295	15.8414	288.348	140.454	126.229	20.7567	15.0661	1536.99	14.6969	Control
13.7082	22.679	31.4505	12.7756	16.0998	520.013	327.51	14.1263	69.9527	47.5341	8.866	9.62455	115.258	13.8428	1102.31	30.1128	10.306	54.1784	46.1908	12.6497	7.41807	75.7143	365.721	47.8529	16.0121	133.248	18.6029	475.06	1027.85	110.126	31.6178	46.9412	159.517	33.6078	366.034	408.403	6.20582	25.0545	14.9169	326.025	98.4574	77.2138	23.23	13.7833	1321.87	9.3746	Control
14.9283	42.8283	27.2551	12.5405	14.1085	469.063	315.302	16.4329	41.6844	83.3506	10.4304	8.88617	114.224	14.6407	1319.7	25.1854	8.27729	34.3805	88.2451	14.9119	7.85616	114.109	259.874	50.5562	18.0965	86.4871	14.6782	501.587	1119.24	153.675	33.2041	50.2522	173.94	16.3956	341.782	481.498	6.38769	17.938	13.9511	404.011	56.61	99.758	23.5654	16.8498	1736.3	18.9393	Control
15.0871	34.392	33.7498	12.9695	19.7521	426.555	340.685	12.193	55.6546	100.196	8.54439	9.37673	93.4398	18.9308	997.698	26.702	10.9477	49.5018	70.4017	20.2627	9.61679	85.6795	293.287	67.8903	12.0655	130.86	17.4208	373.098	1098.23	124.781	46.1369	54.4146	156.549	12.8582	355.993	332.443	7.11942	17.865	12.4451	337.388	105.211	106.975	24.2027	12.9321	1087.21	12.6707	Control
17.2889	26.3632	31.8737	9.42575	12.2467	304.981	296.533	13.1614	48.2144	72.84	8.64959	8.28645	124.119	16.6182	1135.84	28.6944	11.1902	88.6673	59.9054	18.5949	7.1361	80.3753	240.954	52.6709	16.5131	177.679	17.7141	371.954	1005.86	143.864	31.9056	53.1479	183.782	20.2923	311.695	265.972	6.09073	18.9946	15.2017	266.988	42.6567	119.495	18.6632	12.1844	1219.72	11.3727	Control
12.6705	28.297	33.5704	12.646	13.3009	493.555	351.142	10.6064	68.2119	61.0535	8.9282	9.6241	154.619	10.3764	1085.49	26.9591	11.9576	41.4227	58.9204	16.6659	8.40137	75.3572	183.336	50.3706	14.8099	134.214	15.2224	487.544	1118.18	121.514	29.7882	57.7462	174.375	21.9783	369.806	470.579	6.19277	34.8971	13.3921	284.193	82.7188	97.7428	20.1994	13.9499	1498.48	13.7678	Control
16.6439	29.1074	43.0086	12.6422	17.0045	410.635	246.531	14.9501	83.5683	82.2801	9.57148	10.0399	136.429	9.81079	710.769	26.606	9.66952	60.2698	54.8179	14.2723	6.78174	89.3407	174.822	54.0038	14.9159	138.824	18.7386	326.884	1206.32	162.684	39.7112	47.4559	99.4411	22.7861	257.232	407.931	6.34258	22.7837	12.9618	318.941	89.0571	87.2917	20.5413	14.8073	1149.96	10.4293	Control
12.8524	33.0146	36.8051	14.8751	19.4402	558.986	259.588	13.9321	35.4742	74.9659	11.0202	10.0728	121.35	19.7844	1364.06	24.9499	11.0717	60.6712	58.3789	17.74	10.4006	81.6326	201.206	62.7739	18.005	85.6529	25.0602	368.541	1088.25	111.778	39.0687	38.867	144.423	13.2345	342.309	414.83	7.42716	23.425	17.8932	295.187	88.6106	81.8152	19.3252	12.1023	1525.19	12.1023	Control
15.5735	35.9301	40.6615	13.6765	15.0482	640.573	316.341	12.8127	53.9221	79.4966	9.30801	9.05702	131.27	18.2564	1514.25	27.3273	11.4568	33.9322	75.5094	15.7973	7.84633	113.368	604.805	56.7785	20.7724	128.648	21.375	491.487	1068.66	152.822	42.5123	70.7763	144.59	20.2593	335.349	389.312	8.09456	17.7042	20.2267	424.825	91.888	134.469	24.9672	15.4728	1817.27	15.4894	Control
11.4445	32.8092	28.353	11.0842	12.9232	413.344	263.878	12.3973	76.6501	49.2688	9.56124	7.4824	137.244	14.5186	891.686	33.0052	10.4488	40.0209	59.1695	14.7943	10.0432	84.9499	339.952	48.5401	14.938	145.96	15.8883	394.657	914.495	116.798	36.2519	47.3241	176.944	18.4465	277.367	596.609	5.42691	20.3807	15.1287	346.126	95.0411	85.077	20.4388	10.3498	1123.43	13.5171	Control
16.9009	31.7847	42.4528	13.8314	17.1909	670.937	388.259	12.4326	59.331	56.3812	8.02336	9.63003	149.361	15.338	998.59	30.7501	8.08373	36.8761	65.8021	15.4979	8.5491	114.402	528.09	52.4114	17.2745	104.182	16.3423	447.251	1191.14	160.367	32.7377	63.8896	136.602	14.5603	220.58	387.883	6.51117	20.4875	17.6	403.592	101.99	121.208	17.9119	14.1933	1289.33	10.7363	Control
14.0289	35.4718	38.094	12.457	17.4516	331.027	215.242	12.6425	62.9425	51.285	9.06585	9.42891	139.887	12.4049	1034.91	32.1727	12.6691	48.9279	54.0144	16.3275	8.91779	103.658	95.8539	49.6608	13.9599	140.428	22.3244	291.874	1086.32	140.393	36.3924	55.5849	129.942	16.0381	210.729	390.396	6.49484	36.6303	17.0181	235.752	93.393	91.0496	19.6494	12.2642	1067.8	11.505	Control
12.2441	35.5019	41.9582	20.4967	15.0854	403.536	315.722	18.7379	51.4153	114.795	8.78724	9.77028	120.079	14.9967	680.801	30.3322	13.4997	56.4279	78.1351	17.3258	12.409	128.193	361.785	59.6516	14.0131	99.3525	20.621	276.2	1175.64	181.443	46.1955	66.7638	95.4091	17.6179	241.274	693.115	7.80123	15.549	16.1688	323.12	82.153	101.677	26.8544	16.0341	799.577	12.0694	Control
12.9782	31.3376	42.6399	14.2024	13.8123	425.283	230.354	13.8755	56.5854	62.3619	9.2634	9.26424	116.668	11.8334	686.995	30.242	13.4888	42.9878	61.4946	15.1313	9.05839	84.8699	89.0495	65.1584	17.2635	123.027	15.584	446.978	1251.66	170.867	36.4096	58.9253	131.529	15.5138	448.165	471.863	6.65072	40.0067	15.5713	314.957	91.9986	97.976	20.7533	16.0988	1394.16	13.5937	Control
13.9886	39.6952	45.5253	15.8233	12.2586	411.744	262.659	14.1591	44.8941	80.3982	10.0187	8.88538	132.576	15.7579	1369.97	40.3585	11.7534	41.6048	63.3669	13.4148	12.1297	108.303	566.434	42.5601	16.8941	159.191	11.3002	451.695	1096.24	130.668	45.4068	64.5042	139.777	14.5162	281.41	397.746	6.6273	16.9131	11.9396	351.419	106.411	102.188	18.3499	12.9191	1361.21	13.2027	Control
13.6535	29.321	28.1654	14.3794	15.1431	642.416	436.693	11.7459	74.0634	67.5015	9.17441	10.924	193.369	13.4585	1110.7	41.3184	10.9874	43.9469	44.6998	14.4527	7.89965	74.4361	733.033	55.2807	11.9	137.895	16.7582	628.212	1102.06	105.63	33.8953	45.6805	200.793	12.7093	466.502	655.774	5.96719	52.0457	16.5984	462.574	126.258	78.1397	20.227	14.5963	1599.07	11.3072	Control
11.7306	28.8701	33.6017	13.3584	13.6437	522.32	353.138	13.9594	70.7857	64.9789	6.91868	9.99554	152.686	11.7574	1135.3	32.5817	11.7597	68.1971	59.5326	14.0223	6.82958	83.4544	489.19	56.1873	16.674	129.491	17.3818	425.59	1049.23	129.741	33.9386	60.6162	161.025	17.1972	441.398	423.266	6.27775	23.5368	15.6553	342.61	82.0517	90.777	23.7364	12.2071	1119.14	13.3343	Control
11.3277	29.7772	35.2808	11.2541	11.8042	538.71	350.754	13.2277	70.2487	62.3271	8.46732	9.32646	198.464	11.2952	980.048	30.4766	14.0187	55.6639	50.9006	14.2106	7.90772	89.0894	340.906	49.31	17.5541	159.18	17.4334	488.282	1129.42	141.516	35.8805	59.9494	179.536	14.7339	476.817	694.082	5.67677	65.4843	13.7862	426.325	131.722	106.664	19.6825	16.8569	1636.57	8.76952	Control
11.5024	19.3113	33.4324	12.2686	15.5839	463.638	321.354	11.8297	90.7161	58.3186	9.01812	11.9978	165.318	10.2124	1048.65	30.3116	13.1994	30.2577	43.7042	16.536	8.55868	81.4609	177.402	48.0399	11.8304	138.433	9.67188	379.926	1092.9	87.6643	27.9865	55.814	180.438	21.214	318.594	552.685	7.21514	61.4417	12.7866	372.119	126.601	91.3001	24.1286	14.1997	1535.27	11.2896	Control
15.0368	40.3747	36.6397	17.2178	17.9756	424.332	233.084	14.9753	52.2561	77.5206	9.27607	9.21661	124.919	13.6144	835.845	32.8945	14.1067	39.1923	53.5895	19.7475	7.40452	134.75	121.56	61.0816	17.1524	143.696	25.2203	445.822	1143.43	204.768	36.3601	56.6502	153.467	18.1133	359.889	537.387	6.19356	58.2363	19.5728	356.12	54.8413	101.951	34.5777	16.0933	1705.28	15.6138	Control
9.47772	22.4285	27.2977	12.9561	15.993	546.911	385.057	11.7229	80.5456	49.1082	8.17517	10.8913	153.186	15.6133	1272.52	33.8447	12.6859	45.1555	47.6009	17.4092	8.69272	99.7707	406.107	63.1269	17.3214	150.059	17.1376	398.226	1113.13	114.991	23.9564	59.4802	142.936	23.7163	283.017	360.242	6.55402	21.8031	20.9258	342.873	120.064	100.721	31.2761	12.998	1356.66	10.8486	Control
12.5373	34.8506	37.6973	14.0357	17.8719	388.303	207.827	14.5922	25.2422	82.2857	8.40569	8.55467	121.89	16.4318	1041.34	35.8047	7.98052	46.289	69.2952	18.9596	10.5606	86.4124	286.496	54.4895	21.4934	132.675	23.632	389.612	1154.11	176.722	41.3573	55.1038	85.489	14.572	225.697	313.632	6.3593	9.37316	15.6291	308.326	52.9325	125.513	32.7239	16.5384	1391.96	15.9204	Control
12.6698	25.543	32.1727	10.8311	12.1781	518.227	466.29	9.99194	90.5303	51.9577	10.0542	8.5093	176.249	13.2002	1361.5	30.2873	10.5144	46.285	43.3529	16.8743	10.7823	82.9434	401.923	59.4001	14.097	136.947	15.6853	610.554	939.497	118.446	28.2487	50.3063	242.558	14.5871	421.665	508.118	5.29385	29.4956	15.6445	425.049	82.9711	81.619	32.1329	10.1643	1935.49	9.59031	Control
12.8883	27.3722	33.0784	13.1569	13.6126	398.07	329.05	11.8194	73.7178	53.186	8.85207	10.5013	167.717	12.8675	1114.58	31.7842	15.4372	37.3286	49.4929	14.3134	7.6125	86.4469	299.367	49.3286	13.5588	164.363	18.2323	411.892	1135.31	111.786	28.6932	50.777	159.786	29.5642	405.045	494.964	5.91327	37.7545	14.169	299.75	107.616	89.9763	22.8277	12.9609	1333.25	10.2617	Control
13.2494	35.0379	39.6725	15.7044	16.3063	482.341	328.653	13.4176	61.8184	65.0644	8.64982	12.918	117.605	11.4839	1157.55	32.1112	11.8989	48.9628	54.7861	17.5053	7.62221	95.4878	408.228	52.6296	15.4218	164.923	17.2859	504.108	1228.52	156.821	30.9913	49.115	179.72	21.5471	436.515	512.88	6.88363	33.5825	15.3421	367.671	140.738	104.378	22.4828	19.5673	1324.6	10.6783	Control
13.7671	35.1105	44.7311	17.4697	16.0672	471.823	243.57	12.6791	57.1067	85.6591	9.81305	8.07969	137.75	13.6363	741.719	28.7937	9.2345	65.5587	78.3106	19.0885	9.42259	100.181	125.514	52.7738	18.95	147.073	16.0148	314.202	1288.43	161.932	44.3505	50.1461	115.006	12.8964	214.156	336.648	7.06606	19.0328	15.2775	311.933	95.1194	114.915	30.0936	22.3295	1362.83	11.7007	Autism
14.1049	39.9151	46.2346	22.6812	22.6877	429.652	355.308	17.0353	46.7391	113.642	9.0035	10.6681	97.2935	13.756	1051.89	32.0267	10.401	67.6043	57.5673	22.2331	8.41939	116.561	215.807	71.4267	16.6972	182.926	25.2282	464.06	1212.55	151.932	48.3979	58.3654	198.004	16.6896	469.755	534.926	6.48372	21.7548	17.7068	287.155	72.1601	115.395	31.7598	17.3008	1357.44	12.9642	Autism
19.2464	35.9788	44.2627	19.2358	16.8754	400.984	226.826	15.6145	53.569	85.3321	12.0744	10.9611	148.075	15.5836	1198.29	50.5437	11.3748	55.6126	79.5291	17.0704	10.3501	138.298	232.711	67.7884	21.6077	132.426	28.8381	340.729	1082.8	193.911	40.0113	75.2113	115.326	10.8107	250.597	512.044	7.19483	16.6631	16.9534	296.403	95.8788	141.156	26.894	16.6124	1188.73	13.6469	Autism
16.2273	44.3807	58.7831	16.658	16.5859	433.755	287.536	17.637	43.7345	113.314	14.5323	9.84091	119.675	16.658	848.918	40.7866	8.91707	59.6958	75.5195	21.9677	14.4854	179.471	354.92	68.1614	17.0669	109.09	27.0635	260.885	1131.53	200.158	38.3075	56.7517	131.021	14.9245	346.899	408.467	7.88895	12.177	22.5867	276.424	69.4519	186.868	30.1891	25.4999	937.548	12.6813	Autism
17.489	37.3233	43.0493	19.0754	14.7884	345.969	188.011	11.8036	58.1595	126.029	9.08544	9.26803	91.6379	12.4839	608.88	28.2681	10.0116	47.9234	81.9603	21.6387	7.62523	105.453	157.212	54.0223	15.4711	190.326	18.1651	277.545	1211.59	172.353	36.3591	49.9651	122.968	17.1094	290.384	532.865	6.79517	21.6725	20.8181	316.104	102.943	105.708	18.5122	23.3174	939.129	17.0889	Autism
14.1214	30.0231	40.5519	12.0614	15.8333	470.727	350.792	13.9648	44.7355	42.0034	10.5734	10.6409	52.3823	21.247	1019.14	37.7188	12.7779	55.3707	69.4222	18.0401	10.9122	107.636	79.3256	56.3164	20.6371	91.2932	29.6302	483.24	1112.96	130.094	38.6172	58.6007	129.777	14.4695	267.548	341.167	7.37252	43.8006	16.5747	350.353	62.9478	99.4274	23.0047	16.0962	1441.73	12.6342	Autism
14.7624	35.5308	53.7363	13.3199	17.3486	497.917	312.529	13.7283	55.5231	65.7796	8.75707	8.37128	148.863	14.7586	1077.75	33.3469	11.1083	46.9135	68.978	16.7785	11.2267	92.5376	193.569	50.1833	19.1751	157.399	21.7196	426.739	1098.84	169.407	33.5759	54.3316	153.108	19.3706	338.396	436.261	7.46044	35.7634	16.1968	371.6	82.6869	105.87	25.5314	18.4877	1342.69	13.5108	Autism
14.2469	39.3106	41.365	15.6318	21.934	225.18	315.397	16.9897	43.5631	69.7722	9.3486	6.90608	69.8883	15.4868	1047.82	32.9595	10.8084	65.7144	74.8273	22.9275	10.4487	92.6768	61.5734	59.9918	14.8941	153.21	22.7198	431.338	972.884	152.802	39.5484	65.1448	115.849	11.3977	146.631	205.473	7.03611	16.1516	13.8316	191.448	27.2396	139.957	22.9947	16.0184	518.368	13.4872	Autism
16.6563	42.2812	50.6984	20.9709	26.4741	357.899	226.271	16.3675	51.2893	96.5676	9.74194	8.02005	119.199	14.186	615.777	34.8802	15.605	43.9817	59.7156	23.8862	9.44238	114.269	161.013	67.3491	15.8204	142.769	22.0434	300.8	1514.37	157.242	47.2428	67.0947	85.3995	12.9829	256.6	373.795	7.26063	22.7775	19.886	274.137	69.9086	112.82	42.5434	24.5755	877.642	11.9481	Autism
15.4334	27.5669	47.4429	13.7555	13.0617	326.552	184.941	11.3761	61.8468	74.0587	8.94979	9.05503	135.112	15.3026	545.844	28.541	15.773	60.2282	56.8571	14.081	8.04149	93.4764	96.8423	55.778	16.2163	155.574	13.1455	155.441	1269.72	170.418	32.3466	59.3836	87.4828	15.9014	136.519	335.167	5.82582	17.8636	12.4445	289.914	151.486	93.2351	25.0963	15.8496	772.936	15.0326	Autism
13.2378	33.932	42.5641	14.075	20.4175	344.063	257.891	14.2375	65.3557	56.2112	10.4592	8.70505	125.991	11.8943	635.749	33.632	10.2476	45.3306	51.5598	15.2098	9.66867	99.9668	284.79	53.1451	19.6745	170.669	22.4828	326.25	1284.63	167.159	35.2492	59.9105	95.2715	14.8071	256.953	435.016	6.51506	38.924	17.4235	415.544	52.8219	118.583	23.7003	13.4108	1171.95	12.9431	Autism
14.7464	31.0169	23.1902	16.119	13.9348	705.121	389.148	16.2105	77.6802	117.858	10.2135	8.5565	166.728	22.8083	1347.93	36.6192	12.586	58.2352	62.5183	18.7138	7.03562	93.4476	226.086	71.9377	19.1525	145.855	22.8596	708.426	1256.27	119.082	35.6589	60.1186	244.102	11.4459	406.602	504.911	6.70288	23.0919	16.8962	440.255	121.924	82.7436	20.0553	10.5399	1725.08	14.6953	Autism
11.7561	29.1311	39.4393	10.5357	18.2889	394.762	319.578	14.4721	68.552	55.9871	10.397	9.14541	198.244	11.7947	875.923	36.7766	12.37	51.517	45.2726	16.8228	8.99596	92.4332	338.984	45.82	15.1627	132.724	14.1074	374.809	1227.29	101.182	37.0473	52.7944	160.263	16.1869	306.177	491.053	6.58069	19.149	17.0629	368.362	145.54	76.4343	22.5613	17.1079	1743.6	9.94844	Autism
11.8996	31.231	39.814	11.8393	14.0097	485.078	289.478	11.9565	54.8655	73.1805	9.29912	7.87555	130.125	13.269	1164.94	34.5113	10.8837	40.724	56.7406	14.7354	8.30916	81.0781	539.83	56.286	17.0062	158.725	15.8339	599.239	1139.18	154.423	35.2277	46.4995	221.122	15.0058	429.441	324.645	8.05544	42.4997	16.5153	269.635	47.0454	107.218	24.0695	9.91106	1565.36	17.7413	Autism
17.6595	51.299	63.362	19.2475	19.303	313.89	217.879	15.3988	48.6439	98.8991	11.0944	8.70507	77.9032	18.9874	852.768	32.5852	10.3976	51.0391	68.5592	14.8454	10.6292	177.924	91.4526	71.419	18.7428	159.218	27.5018	344.149	1180.58	192.547	51.1535	55.497	114.447	13.6898	301.241	410.447	6.49548	26.3718	16.8778	256.275	49.9127	115.24	33.5038	15.4871	1359.68	12.7906	Autism
12.9298	25.5837	40.0611	12.7753	16.4706	458.552	318.368	13.9784	66.5898	49.6457	8.40373	9.05886	124.968	11.8653	948.724	26.16	13.5329	55.1449	59.5795	20.3024	9.62803	101.375	272.056	59.6057	16.5811	142.341	17.7118	461.83	1294.2	150.724	38.8963	51.1575	182.758	16.51	427.682	579.934	5.88392	38.2857	13.6243	383.548	87.2753	108.074	20.8312	17.1217	1196.35	13.5104	Autism
15.4454	47.9328	39.2082	14.4036	16.4494	465.75	348.3	16.0324	65.1089	76.4616	10.2619	9.60511	113.165	19.168	1096.54	26.7391	9.43367	45.355	60.1558	19.3693	7.65628	60.2989	477.922	57.9766	18.3312	183.321	15.792	467.711	1212.49	117.368	30.4149	64.3071	178.005	18.1577	328.856	480.835	7.13368	28.0698	14.0365	372.046	92.3202	77.3571	20.3389	11.8021	1644.76	12.9718	Autism
15.2616	38.1203	52.5976	20.2457	19.8779	382.732	256.294	17.2095	34.3769	80.8282	9.78811	10.3097	102.946	12.6543	850.237	40.0383	10.3668	47.3313	59.4099	20.1491	12.8246	115.81	436.907	65.2472	16.7565	134.886	21.5267	347.912	1379.95	183.874	51.106	57.5871	145.335	13.915	372.67	546.045	8.00162	24.9979	17.6888	251.68	87.3762	139.804	31.4036	22.0376	1293.6	13.8594	Autism
12.5136	35.123	46.4937	15.0231	18.1768	393.243	330.543	12.0791	64.7734	64.7719	8.05857	8.24097	180.584	12.3586	915.419	26.2601	9.39698	48.2747	55.0931	14.6771	9.3104	88.2766	557.209	53.761	15.4252	123.434	23.2904	477.503	1199.67	117.899	30.8933	63.9531	164.78	13.2622	406.157	511.608	6.81415	24.2987	17.682	401.358	128.094	104.48	24.3997	18.6399	1770.3	13.1887	Autism
19.4975	37.707	53.1301	12.4996	22.651	497.824	237.933	15.8737	51.7752	83.4078	10.0924	8.89398	102.562	16.5008	506.536	37.9852	10.154	84.7854	70.0351	17.9575	9.35288	112.937	79.308	61.4087	18.4793	140.926	20.6436	309.243	1637.14	211.725	50.3714	72.66	72.5163	11.7125	233.201	433.308	8.16797	15.4542	16.0979	306.51	56.9372	110.045	26.1684	18.7713	1131.27	12.5153	Autism
17.0053	36.0951	47.2083	27.0548	17.922	297.709	252.392	16.0582	42.1433	125.938	8.83309	8.93345	116.197	15.8496	673.863	27.925	12.0447	55.6003	66.5973	20.4396	8.94777	117.279	74.4104	64.9575	17.4627	146.324	19.1767	192.212	1470.84	166.77	48.7693	54.2459	88.4822	19.2713	212.276	347.917	6.49735	20.1842	20.7253	256.844	57.5433	100.01	26.9873	18.6289	826.654	13.7787	Autism
14.0019	30.7279	31.1329	17.567	15.4911	400.199	341.911	12.3591	50.5639	60.5643	11.7616	9.17441	162.358	19.1816	1195.32	31.8347	12.1651	46.1524	85.5564	20.7897	8.80063	92.7908	168.826	53.5902	15.3095	191.525	16.4599	323.296	1075.55	133.384	29.1026	45.4699	125.515	13.188	279.576	456.279	8.2394	13.2413	10.9817	289.051	72.1034	111.763	25.2851	9.55529	1234.39	12.025	Autism
13.0744	30.9149	44.9439	14.178	16.7864	417.324	301.644	13.1763	63.6016	66.6034	9.73773	11.5125	169.414	11.3172	795.746	29.7218	10.6958	84.4936	55.2599	16.7864	8.46806	97.9412	235.878	64.5752	16.6972	187.383	20.1924	393.36	1277.99	169.789	37.4146	50.2564	130.303	14.2674	348.037	452.597	6.72022	18.7962	15.9848	291.025	94.2082	99.7409	26.8077	15.3247	1425.66	11.5158	Autism
17.4436	33.3344	44.2436	20.0111	19.4835	373.888	210.141	20.275	48.486	102.979	10.3745	10.1188	128.023	15.1535	716.652	35.3685	9.11985	52.3769	77.1993	25.9877	11.8378	122.79	218.362	73.3046	16.3472	114.678	17.2208	295.476	1197.91	174.059	42.7924	68.6757	107.467	15.3502	265.032	433.103	7.07872	17.4436	26.9861	249.057	46.8974	116.391	29.3214	25.5934	1061.48	11.8957	Autism
17.4141	24.8288	32.6602	14.9545	11.03	366.255	328.739	14.9096	39.4405	83.8034	10.315	8.2826	66.825	16.3525	1114.13	29.8495	10.5005	49.6598	88.6082	18.9677	9.87811	120.874	116.049	65.6293	20.1304	112.433	24.2737	418.634	1245.43	140.54	40.2298	68.9043	166.098	14.735	285.426	427.389	7.80863	23.2662	17.7582	349.558	79.2577	97.7214	15.8791	15.2828	1172.79	12.8066	Autism
16.018	53.6474	44.6292	23.7686	21.8472	291.215	251.666	15.638	55.1874	91.041	9.44983	9.35593	81.6383	16.6232	1017.9	34.759	7.92772	57.2541	91.8493	19.5006	8.9407	150.214	136.386	75.4145	18.4349	144.552	28.8344	356.756	1187.52	209.927	47.0052	50.6057	100.371	14.6776	257.13	412.878	7.04635	17.8323	18.5649	287.465	65.3141	104.364	25.7056	22.0483	1178.07	14.6321	Autism
14.0215	36.1128	43.8008	16.7041	17.7907	292.179	265.935	12.8131	69.3028	61.1514	7.96954	10.0388	86.0697	12.2321	929.447	34.7871	9.24001	60.8661	58.6699	14.6237	7.97415	89.9862	95.5448	72.1515	15.8794	171.562	18.5849	288.324	1288.16	140.79	47.0535	53.537	142.913	18.7239	328.524	371.768	5.98626	13.3194	15.6581	254.859	56.7376	105.471	23.361	18.5308	967.295	12.3386	Autism
13.0597	30.8221	50.1366	12.7764	19.4959	414.625	324.453	11.6505	70.532	73.4162	9.40598	8.55243	120.102	14.6611	1074.37	34.0728	10.8839	61.5034	64.666	16.253	10.351	108.106	301.231	47.6544	17.0984	166.96	24.0451	534.478	1236.67	150.731	37.2132	57.2908	149.406	12.9192	295.661	431.356	7.19234	24.9193	16.3195	277.862	121.087	93.0232	24.1166	19.5649	1259.68	11.4814	Autism
12.6437	31.3452	49.4025	16.4587	16.9506	363.672	246.79	13.1454	62.4135	55.9662	8.88004	8.75544	141.55	15.7572	647.168	29.0171	10.8124	45.5622	61.9658	16.778	11.1308	98.6278	307.574	51.8697	17.2392	155.576	20.1062	286.626	1254.41	157.746	36.0488	56.8878	100.932	15.5445	280.003	442.011	6.69414	38.7476	16.2436	467.014	60.386	104.988	24.1215	14.8434	1185.75	13.0412	Autism
11.6878	34.8229	41.9238	13.6047	21.3871	456.549	269.702	12.8879	65.9222	81.1711	9.61942	8.72631	139.04	13.87	678.177	32.1222	9.26777	58.1097	71.2979	16.169	9.23958	103.802	350.307	48.804	15.5604	127.904	18.3276	381.911	1384.34	123.008	38.9152	49.4368	116.505	18.2558	370.55	436.007	6.54518	41.0589	17.6626	354.176	84.2377	100.986	26.3288	15.0369	1311.77	11.5418	Autism
14.3708	26.7418	37.6223	12.5512	15.7798	519.374	301.622	9.02194	62.4387	68.2405	12.5584	8.35069	105.515	15.7766	1033.73	30.0833	8.65219	48.3193	64.3318	14.7534	8.96245	91.8311	143.129	53.6447	14.5987	179.3	16.32	396.111	1050.86	130.633	34.137	58.5518	128.854	14.8561	303.563	445.827	6.82726	26.1822	16.3596	352.725	88.293	104.815	21.3566	12.8903	1550.23	11.4645	Autism
16.8792	29.6886	32.0459	15.7338	16.3688	508.282	355.383	12.3494	71.8057	63.2811	7.96779	9.70084	177.277	19.8698	1296.09	33.1099	11.5639	51.2381	45.7518	16.5218	9.48828	92.748	189.435	59.8802	18.5202	125.565	16.5317	529.905	978.305	109.258	34.4317	53.5241	177.742	16.8663	366.811	432.289	6.04269	19.4807	13.5352	308.162	97.049	103.251	27.6264	13.6151	1587.63	17.305	Autism
17.1457	37.8948	42.1758	18.1442	17.0429	571.907	256.428	20.7136	49.4264	80.8283	8.74701	8.29357	212.646	14.9719	856.933	44.549	9.07897	77.5518	71.0747	14.0146	8.82268	114.58	539.266	46.6729	15.2688	98.5755	23.7387	536.67	1343.61	127.461	41.3154	65.262	152.914	12.6442	402.444	399.23	7.22069	19.0056	12.1894	409.519	144.614	91.9958	25.3052	15.2445	1763.68	15.0208	Autism
19.3568	41.2579	43.0846	12.3715	14.2719	405.851	310.149	11.6912	73.0559	68.9682	9.2535	8.663	95.8877	17.7061	1139.95	31.4259	10.6008	60.814	74.3217	17.0062	9.32687	76.2329	171.615	54.8823	20.479	160.722	22.2289	342.434	1088.94	133.26	36.2108	59.0066	148.331	13.9362	279.686	329.907	6.52541	24.3336	16.449	280.024	54.5906	100.818	29.6959	16.0369	1224.75	12.9403	Autism
12.4705	32.633	45.6804	12.3903	16.072	482.709	223.975	11.7826	67.1849	72.6231	10.2924	8.10042	128.403	13.7615	449.885	26.7452	12.6339	59.2024	57.5616	14.3959	8.78028	121.346	92.537	61.9675	18.709	156.453	20.4988	313.057	1233.48	202.457	36.2509	49.1792	90.0301	10.8918	272.002	420.682	5.83421	22.9207	14.9643	334.202	59.3053	126.105	33.7702	13.7787	1206.58	15.1007	Autism
12.2247	23.3435	43.052	13.6794	13.749	473.85	359.385	13.836	71.3117	53.4533	9.48567	9.95463	114.94	14.9366	1185.52	34.3614	12.9643	34.2376	52.8607	18.5404	9.37362	74.311	385.254	47.997	11.0117	146.008	12.9917	420.735	1118.23	94.9799	29.1384	56.1588	185.13	11.1158	399.364	523.904	6.17346	53.3771	14.4873	284.105	102.251	93.5834	27.9858	13.3385	1265.69	11.827	Autism
13.1769	31.5065	35.9407	11.0011	19.9938	309.259	323.097	9.99693	67.4386	58.9036	9.00943	9.28989	128.22	13.368	981.854	33.2817	12.1346	63.2403	58.4891	14.8991	8.92443	91.9717	276.649	46.8433	16.4767	208.725	18.3612	372.065	913.296	164.818	23.6922	53.5828	187.257	21.3429	304.09	453.344	6.34023	23.7827	15.6597	276.561	87.1229	92.9075	21.2363	14.0625	1200.01	13.7874	Autism
17.1576	36.4997	31.6133	13.848	18.195	473.215	274.122	13.4809	65.3259	55.0439	8.4267	9.16954	138.006	20.0337	899.29	30.0062	10.3514	53.3922	59.1811	22.4679	9.24463	111.791	113.699	50.405	20.6125	122.718	21.891	410.837	1013.18	131.791	33.0351	53.7114	166.775	16.8975	238.68	373.138	7.23564	17.1355	15.3949	325.806	63.405	101.951	22.5672	18.2998	1056.81	12.5734	Autism
16.4212	31.1613	39.7422	18.6892	15.9308	457.724	246.098	13.8429	69.5364	63.3927	11.3573	7.89837	123.73	14.1206	861.437	32.5804	11.0183	46.4624	61.0896	19.5354	9.70367	84.6551	288.135	60.7182	13.9839	133.444	18.2323	457.51	1294	131.702	30.3128	43.671	126.783	22.5373	268.168	396.804	5.99956	44.2701	19.381	386.762	102.132	88.1326	24.2888	11.7157	1128.27	14.4859	Autism
13.0347	26.3929	32.2025	12.1761	18.0338	409.527	310.061	16.658	85.165	58.2423	10.5935	9.96561	186.756	12.8071	1055.12	37.1746	10.6168	58.5806	41.5101	13.7005	9.39302	85.409	330.197	55.9391	12.6827	114.001	16.1022	483.207	1258.51	99.8602	32.0892	57.3463	194.7	17.8666	479.619	487.106	5.94262	32.8678	16.9339	325.788	62.0686	83.2967	27.8146	13.3982	1655.51	14.5992	Autism
16.7093	40.037	39.0146	13.7411	17.3453	478.556	315.213	14.9467	50.9462	78.129	10.7481	9.33331	127.212	15.3572	1151.49	36.1454	8.79013	47.8541	63.3117	15.7497	10.2019	114.082	241.392	64.2984	23.5544	161.881	26.8385	445.092	1312.48	157.748	36.8588	72.0526	187.108	11.8052	340.275	509.43	6.14435	27.8972	19.3072	288.213	71.3048	130.287	26.9324	16.3313	1361.44	12.8393	Autism
13.2563	25.9274	47.8703	11.3331	17.7978	536.752	345.353	9.71604	59.5547	58.5622	8.08424	9.18594	177.598	20.4917	941.651	31.7312	12.7019	38.6682	46.5723	13.328	11.702	98.4541	158.135	61.4446	15.2162	114.265	16.6568	471.78	1051.06	143.724	34.6984	67.6469	194.663	11.5064	379.199	632.223	7.5487	26.1767	13.0741	443.313	107.586	109.361	19.9359	12.2512	1649.12	12.9838	Autism
14.0527	28.945	37.1661	17.9683	15.0858	297.522	189.883	16.7357	52.9932	97.0926	13.2072	9.96364	85.6109	11.4599	681.525	36.4347	11.5433	75.831	63.6812	19.2266	11.5459	88.3148	392.095	58.0933	17.4627	154.322	17.1145	285.855	1413.11	151.208	40.4928	52.192	114.683	17.3398	190.023	428.231	6.43178	13.0776	14.3141	203.246	65.5663	119.582	27.2626	13.0139	874.626	13.3085	Autism
21.6216	25.4979	32.9149	13.3179	15.3658	349.628	341.643	15.6665	57.7827	68.4113	8.53486	9.71388	154.107	12.0822	1173	31.1643	9.58291	71.9983	63.2553	17.5996	11.9119	79.0077	194.024	49.5413	22.0072	139.881	19.5054	316.622	1019.88	114.753	33.3727	60.43	140.886	13.2704	219.305	363.772	7.2679	19.6204	16.1689	316.696	79.4092	117.747	19.8972	19.2697	1092.77	13.5863	Autism
14.0429	28.9823	43.7536	12.8969	16.5944	442.188	231.101	12.712	67.3207	62.5986	8.77878	8.06666	115.453	13.4349	795.004	22.7274	13.4648	74.3842	47.8705	16.7704	7.6277	90.4268	312.597	54.0984	16.3778	153.954	15.0664	420.812	1293.07	135.09	35.6969	51.6716	130.535	14.4754	298.574	417.16	6.71662	55.6524	11.8762	368.92	140.738	83.2031	18.8683	14.6882	1618.07	12.7477	Autism
14.4886	20.7189	36.4388	12.3584	15.5101	365.186	274.344	13.983	76.8336	83.95	7.92073	10.1575	157.925	12.6538	798.676	32.3633	8.98972	57.3807	42.8347	16.4105	8.27278	88.4947	233.144	55.3535	15.4573	155.265	16.4481	357.028	1178.99	112.855	29.7809	53.3701	154.798	22.684	342.644	488.826	6.37527	37.8019	12.4402	260.856	96.7691	82.6097	25.4382	13.016	1192.8	11.4051	Autism
13.1395	33.554	40.1154	14.7445	22.571	505.669	278.523	14.3384	54.2178	63.192	10.9101	10.2154	120.338	13.7615	833.832	41.0269	9.22453	42.7306	58.1179	20.419	7.13469	88.163	453.306	61.6809	11.5543	128.981	16.0414	567.219	1122.56	152.127	39.3385	55.0552	175.614	14.6361	320.515	534.299	6.84335	30.7246	17.9789	292.883	96.2952	122.911	25.8862	12.6913	1526.1	10.7391	Autism
16.2344	42.9575	46.0302	23.0478	19.6656	474.788	250.192	15.6038	47.8589	101.483	11.7466	8.43017	104.257	13.4516	901.146	32.7936	9.75323	99.6044	80.5671	21.511	9.71939	151.395	353.032	57.4639	19.4905	137.911	32.6494	334.919	1191.62	202.581	43.3623	71.9921	88.9254	14.0478	222.916	477.486	8.05615	14.7287	21.7362	355.523	143.558	137.823	25.2227	20.4112	1097.18	13.6846	Autism
15.9939	35.2421	27.7694	17.0593	18.498	482.564	308.152	12.5136	77.8745	47.7297	14.1773	8.77769	81.1168	11.945	1213.54	40.9542	12.8531	42.6137	40.6465	19.9114	9.11289	88.473	552.981	56.3998	15.8715	170.134	21.7191	532.898	1386.98	109.917	33.1875	48.3708	180.809	14.7469	488.643	467.946	6.17649	20.465	19.3642	341.263	59.5719	91.074	23.2852	17.1217	1351.7	12.2441	Autism
17.9067	34.3144	43.0977	17.4697	18.3849	337.4	267.295	12.0976	70.1333	102.565	8.47787	9.37871	73.4169	13.4	757.999	33.0831	11.1923	59.1077	63.4745	17.8453	10.2812	104.621	96.1373	54.8619	15.2377	184.945	20.1928	319.021	1354.66	183.16	51.8758	56.1879	96.0485	14.5025	242.454	405.101	6.5432	27.1209	15.1618	282.332	57.2096	104.495	19.8941	20.2662	1092.62	13.8901	Autism
12.1252	29.4042	46.0151	15.8192	13.5095	329.809	249.548	13.0647	85.072	63.8765	8.0553	8.11564	100.843	12.4725	719.16	30.5906	11.1261	48.6845	56.1456	17.4572	8.45561	95.3475	162.87	53.9064	15.4223	181.128	15.8486	272.307	1251.19	162.096	35.6969	44.3575	137.709	11.747	225.749	460.521	6.9579	28.0315	15.1911	257.831	96.4142	111.336	24.0359	18.0922	1054.8	10.7864	Autism
13.5365	33.0793	43.2851	17.5079	21.274	382.01	262.405	14.5726	51.8891	76.4658	9.76502	8.8285	124.328	16.1984	990.859	35.7555	10.7558	69.3954	65.7184	19.4212	9.09886	89.3656	267.936	64.373	16.5573	178.21	17.3545	470.868	1144.6	145.541	44.242	50.015	165.962	13.4039	326.137	378.276	6.43353	28.4098	19.0096	239.535	82.1559	102.615	24.0525	16.5538	1217.03	13.6189	Autism
17.8011	39.1309	46.6141	23.6699	17.7552	270.269	222.537	18.6727	36.0831	102.344	10.2494	10.5126	70.0168	16.9885	529.078	34.3752	11.6613	51.7076	80.4085	22.141	9.75042	159.903	107.216	63.8686	16.7307	146.19	24.4744	228.376	1325.93	199.124	48.9819	66.3408	81.2347	15.3664	139.989	299.89	6.35869	24.4972	20.0735	227.827	57.6873	143.473	34.5023	18.0609	831.559	12.0167	Autism
14.2696	52.4843	42.1095	21.3851	18.1259	402.248	274.658	14.937	45.8643	116.72	9.63308	8.73234	111.517	20.9291	777.223	36.4747	9.80951	63.2827	79.507	20.3342	8.48025	152.437	155.695	72.7864	18.1459	129.999	27.8703	332.967	1188.08	165.626	52.398	59.3271	88.1824	15.0315	314.235	363.036	6.50313	13.6109	24.9366	283.371	33.5965	108.433	24.6618	25.0991	1333.54	12.9344	Autism
12.8572	28.001	33.8927	16.2934	21.4134	374.494	218.299	13.6661	56.9632	81.7249	11.8239	10.8317	140.167	15.7712	1004.39	26.6859	11.5182	45.1527	51.8225	21.046	9.18918	78.5369	63.7531	54.8439	16.5055	112.358	16.6698	342.058	1134.96	141.849	41.0986	57.2919	87.325	16.9236	282.426	419.153	6.61473	34.3974	14.0976	382.123	81.0039	89.8537	21.4587	18.265	1134.22	13.0971	Autism
15.5022	49.41	44.4952	18.3914	19.4847	519.937	265.042	14.9586	46.942	118.607	11.0927	9.6856	132.746	18.4848	1014.2	33.2894	9.34117	55.53	67.3594	22.1762	8.05361	144.961	259.775	57.1879	20.3515	180.589	27.1986	427.927	1106.84	178.368	36.7089	62.5679	149.343	17.8897	383.847	410.715	7.64499	21.0958	17.173	271.809	72.2536	138.054	22.1762	16.5272	1235.9	13.5729	Autism
17.2176	32.1446	40.082	22.333	23.1726	409.788	266	14.8944	52.9629	75.5192	8.74108	8.47174	105.871	15.039	865.735	38.4005	10.5082	67.4662	69.4082	17.3873	11.8367	100.31	95.9964	58.1966	17.532	159.987	18.8822	454.691	1222.68	151.301	50.2217	47.2714	107.831	16.5756	300.335	432.393	6.31611	29.1238	21.3477	299.394	57.8655	96.8805	18.5674	21.2367	1405.51	10.6216	Autism
14.3004	34.6873	39.7926	12.9726	17.5509	439.312	226.355	11.0015	54.5578	62.9958	8.75672	7.10789	127.764	10.7392	750.385	26.728	11.4021	49.3055	54.1496	17.4528	6.61619	97.3848	108.924	56.364	18.9562	140.985	21.8126	417.415	1375.58	170.224	38.1829	51.509	128.111	15.5171	425.842	470.795	6.20501	37.9702	16.5113	310.974	101.023	108.894	18.4778	11.4429	1427.71	13.5149	Autism
17.9485	39.6188	47.4078	24.9634	18.8334	389.036	252.217	20.8427	58.5562	95.0127	13.8275	10.5641	143.553	13.4347	947.477	33.4933	11.4551	41.2447	96.2392	18.0435	9.88068	161.228	209.125	58.0277	22.2618	160.57	28.6394	325.276	1164.64	223.032	51.7271	77.0152	113.233	16.2029	161.573	420.436	7.37977	11.4841	17.1048	348.552	86.1675	148.779	30.5904	23.3866	1271.71	10.8013	Autism
14.7969	35.8964	43.5213	15.8161	18.0583	403.761	223.893	11.9133	43.2312	85.5665	8.15841	7.4561	91.0815	14.3989	844.153	27.9869	12.1763	51.0663	64.6116	15.4776	9.72457	111.51	188.264	62.7671	16.8366	141.248	25.6304	382.774	1370.83	173.536	39.8663	59.8409	76.2889	16.9031	270.057	420.776	7.68622	28.1563	18.3933	380.174	85.2098	101.335	25.7578	20.0994	1443.08	13.5495	Autism
13.9975	42.2579	42.9013	18.0353	16.1451	625.077	312.698	17.6748	40.6805	73.3835	8.71027	9.12877	127.055	13.4126	1019.31	32.8918	14.4499	53.491	52.1516	22.7379	8.08733	114.318	416.099	56.8111	17.5615	126.551	24.8813	431.739	1025.97	175.79	34.835	65.9742	142.905	19.0035	333.309	592.515	7.78727	38.6373	18.841	358.875	106.411	125.257	36.6333	16.9935	1589.99	17.462	Autism
15.4901	53.474	42.9615	11.6642	14.3017	388.98	301.926	10.9337	35.7377	99.6601	11.6528	7.54672	88.1511	35.3202	844.092	26.4982	9.54034	67.7586	100.737	18.1358	7.60099	93.8665	210.31	37.0093	33.854	159.982	15.9719	362.309	961.02	159.392	31.3917	50.3542	123.304	11.8815	247.152	333.259	6.85272	17.4358	15.2102	276.117	89.7233	110.703	26.6254	14.6225	1096.8	17.5909	Autism
14.2923	30.5472	29.8088	12.6823	18.1099	377.717	276.574	12.6078	75.1093	59.8519	7.8817	8.54948	133.921	11.3207	704.38	40.86	13.114	62.9869	45.2664	18.7612	9.20075	76.2329	283.267	50.1662	19.6745	183.493	14.8103	316.713	1156.7	134.632	36.4868	51.8427	123.109	14.2817	246.963	326.534	5.7741	24.6882	9.57445	261.899	69.1316	93.0635	25.2448	13.2246	1215.52	13.6361	Autism
12.887	42.7266	40.8497	13.9552	16.912	400.447	303.546	16.4509	63.673	63.5898	9.11131	7.8735	109.051	24.9968	1143.41	36.3642	7.85775	49.3799	73.3765	16.4463	10.061	116.314	268.92	44.3153	18.5741	201.897	16.055	317.917	1142.13	111.533	34.1771	49.0749	162.098	14.535	300.241	406.771	5.95518	21.1018	19.5094	327.604	77.2893	105.919	25.3006	14.4305	1173.89	16.4117	Autism
20.5565	44.1221	45.1807	22.2863	18.269	430.915	340.727	16.8745	62.4731	103.389	9.41331	8.79928	136.9	16.4998	991.673	34.8517	10.81	67.3434	85.9356	16.7678	11.6223	165.912	474.777	70.1537	16.7978	112.993	30.4195	403.4	1373.81	173.28	44.9658	58.512	128.809	14.0166	311.755	390.162	7.33775	16.6682	17.3394	312.607	52.3	116.188	26.1499	15.9664	1153.83	12.1628	Autism
